# Supplementary material for: A five-year model to assess the early cost-effectiveness of new diagnostic tests in the early diagnosis of rheumatoid arthritis
Source: Springer Nature journal article supplement (doi:10.1186/s13075-016-1020-3), 2016-06-10
Supplement: MOESM1 [file 10245008]

**Additional file 1: Table S1. Cohort characteristics**

| Source                                 | Patient population                                         | Age (SD)                               | Sex<br>(% female) | ACCP/RF<br>positive           | ≥6 points<br>on RA-<br>2010<br>criteria | Intervention                                                                          | Control                                               | QALY<br>data<br>available | Work<br>outcomes<br>data<br>available |
|----------------------------------------|------------------------------------------------------------|----------------------------------------|-------------------|-------------------------------|-----------------------------------------|---------------------------------------------------------------------------------------|-------------------------------------------------------|---------------------------|---------------------------------------|
| <b>REACH</b><br>[1]                    | Newly detected<br>early inflammatory<br>arthritis patients | 53 (15)                                | 68%               | 43%                           | 42%                                     | Usual care                                                                            | NA                                                    | Yes                       | Yes                                   |
| <b>tREACH</b><br>[2]                   | Newly diagnosed<br>RA patients                             | I: 53 (15)<br>I: 54 (14)<br>C: 54 (14) | 60%<br>72%<br>70% | 81%/76%<br>72%/70%<br>77%/67% | 97%                                     | Methotrexate,<br>Plaquenil,<br>Sulphazalazine<br>Prednisone as<br>bridging<br>therapy | Methotrexate,<br>Prednisone as<br>bridging<br>therapy | Yes                       | Yes                                   |
| <b>DREAM</b><br><b>registry</b><br>[3] | Newly diagnosed<br>RA-patients<br>(clinical diagnosis)     | I: 58 (14)<br>C: 57 (13)               | 61.7%             | 68%*                          | NG                                      | Treat- to-target<br>step-up<br>therapy                                                | Usual care                                            | No                        | No                                    |

I: Intervention; C: Comparator; SD: standard deviation; QALY: quality-adjusted life year; \*RF only; NG: Not Given; NA: Not Applicable.

## References

[1] REACH data on file.

[2] De Jong PH, Hazes JM, Han HK, et al. Randomised comparison of initial triple DMARD therapy with methotrexate monotherapy in combination with low-dose glucocorticoid bridging therapy; 1-year data of the tREACH trial. *Ann Rheum Dis* 2014;73(7):1331–9.

[3] Vermeer M, Kievit W, Kuper HH, et al. Treating to the target of remission in early rheumatoid arthritis is cost-effective: results of the DREAM registry. *BMC Musculoskelet Disord* 2013;14:350.
