# Supplementary material for: A five-year model to assess the early cost-effectiveness of new diagnostic tests in the early diagnosis of rheumatoid arthritis
Source: Springer Nature journal article supplement (doi:10.1186/s13075-016-1020-3), 2016-06-10
Supplement: MOESM3 [file 10245008]

**Additional file 3: Table S3. Model input parameters**

| <b>Parameter</b>                                                           | <b>Value</b> | <b>SE</b> | <b>Distribution<br/>(alpha;beta)</b> | <b>Source</b>                      |
|----------------------------------------------------------------------------|--------------|-----------|--------------------------------------|------------------------------------|
| <b>Prevalence of RA based on ACR/EULAR 2010 RA classification criteria</b> |              |           |                                      |                                    |
| All patients                                                               | 0.540        | 0.021     | Beta (300;252)                       | REACH <sup>+</sup>                 |
| Intermediate risk patients                                                 | 0.370        | 0.030     | Beta (97;166)                        | REACH <sup>+</sup>                 |
| <b>Probabilities</b>                                                       |              |           |                                      |                                    |
| <b>  Methotrexate start and continuation</b>                               |              |           |                                      |                                    |
| Patients with $\geq 6$ points at baseline                                  |              |           |                                      |                                    |
| Start at baseline                                                          | 1.000        |           |                                      | [1]                                |
| Continuation at 6 months                                                   | 0.840        | 0.024     | Dirichlet (1,282;0.0007)             | REACH <sup>+</sup>                 |
| Continuation at 12 months <sup>†</sup>                                     | 0.880        | 0.026     | Dirichlet (1,125;0.0008)             | REACH <sup>+</sup>                 |
| <6 points at baseline                                                      |              |           |                                      |                                    |
| Start at baseline                                                          | 0.000        |           |                                      | [1]                                |
| Start at 6 months                                                          | 0.350        | 0.027     | Dirichlet (167;0.0021)               | REACH <sup>+</sup>                 |
| Continuation at 12 months <sup>†</sup>                                     | 0.840        | 0.035     | Dirichlet (592;0.0014)               | REACH <sup>+</sup>                 |
| Start at 12 months                                                         | 0.140        | 0.053     | Dirichlet (7;0.0199)                 | REACH <sup>+</sup>                 |
| <b>  Other diagnosis</b>                                                   |              |           |                                      |                                    |
| $\geq 6$ points at baseline                                                |              |           |                                      |                                    |
| 6 months                                                                   | 0.140        | 0.022     | Dirichlet (35;0.0038)                | REACH <sup>+</sup>                 |
| 12 months                                                                  | 0.120        | 0.021     | Dirichlet (201;0.0045)               | REACH <sup>+</sup>                 |
| <6 points at baseline                                                      |              |           |                                      |                                    |
| 6 months                                                                   | 0.510        | 0.028     | Dirichlet (322;0.0016)               | REACH <sup>+</sup>                 |
| 12 months                                                                  | 0.000        | 0.000     | Dirichlet (0.000; 0.000)             | REACH <sup>+</sup>                 |
| Biological use at 12 months                                                | 0.100        | 0.021     | Beta (0.027;21)                      | REACH <sup>+</sup> ,<br>DREAM [2], |
| Biological start – per 3 months                                            |              |           |                                      |                                    |

| <b>Parameter</b>                                               | <b>Value</b> | <b>SE</b> | <b>Distribution<br/>(alpha;beta)</b> | <b>Source</b>        |
|----------------------------------------------------------------|--------------|-----------|--------------------------------------|----------------------|
| Total                                                          | 0.020        | 0.010     | Beta (4;48)                          | DREAM [2]            |
| DAS28 $\leq$ 2.6                                               | 0.002        |           |                                      |                      |
| DAS28 $>2.6-\leq 3.2$                                          | 0.006        |           |                                      |                      |
| DAS28 $>3.2$                                                   | 0.012        |           |                                      |                      |
| EQ-5D always $>0.5$ over time                                  |              |           |                                      |                      |
| Patients not using a biological                                | 0.752        | 0.024     | Beta (245;81)                        | tREACH <sup>++</sup> |
| Biological patients                                            | 0.736        | 0.030     | Beta (155;56)                        | tREACH <sup>++</sup> |
| <b>DAS28 increase at time of biological start</b>              |              |           |                                      |                      |
| Delta DAS28 $\leq 2.6$                                         | 2.064        | 0.120     | Normal                               | tREACH <sup>++</sup> |
| Delta DAS28 $>2.6-\leq 3.2$                                    | 0.860        | 0.058     | Normal                               | tREACH <sup>++</sup> |
| <b>OLS functions of DAS28 over time since start biological</b> |              |           |                                      |                      |
| 0–3 months from biological start                               |              |           |                                      |                      |
| Time                                                           | -0.290       | 0.038     | Normal                               | tREACH <sup>++</sup> |
| Constant                                                       | 4.019        | 0.109     | Normal                               | tREACH <sup>++</sup> |
| 4–15 months from biological start                              |              |           |                                      |                      |
| Time                                                           | -0.044       | 0.014     | Normal                               | tREACH <sup>++</sup> |
| Constant                                                       | 3.564        | 0.172     | Normal                               | tREACH <sup>++</sup> |
| 16–48 months from biological start                             |              |           |                                      |                      |
| Time                                                           | -0.015       | 0.011     | Normal                               | tREACH <sup>++</sup> |
| Constant                                                       | 3.426        | 0.289     | Normal                               | tREACH <sup>++</sup> |
| <b>Costs</b>                                                   |              |           |                                      |                      |
| <b>Costs during 1<sup>st</sup> year – 0-12 months</b>          |              |           |                                      |                      |
| Baseline visit and diagnostic tests                            | €917         | €138      | Gamma (€44;€21)                      | Estimate***          |

| <b>Parameter</b>                                        | <b>Value</b> | <b>SE</b> | <b>Distribution<br/>(alpha;beta)</b> | <b>Source</b>        |
|---------------------------------------------------------|--------------|-----------|--------------------------------------|----------------------|
| Follow-up visits and diagnostic tests during first year | €676         | €101      | Gamma (€44;€15)                      | Estimate***          |
| MTX costs plus monitoring during first year             | €102         | €15       | Gamma (€44;€2)                       | Estimate***          |
| <b>Other sDMARD costs</b>                               |              |           |                                      |                      |
| True positive patients                                  | €165         | €10       | Gamma (€253;€0.65)                   | REACH <sup>+</sup>   |
| False positive patients                                 | €103         | €14       | Gamma (€56;€1.83)                    | REACH <sup>+</sup>   |
| True negative patients****                              | €57          | €5        | Gamma (€112;€0.51)                   | REACH <sup>+</sup>   |
| False negative patients                                 | €117         | €11       | Gamma (€104;€1.12)                   | REACH <sup>+</sup>   |
| <b>Productivity costs</b>                               |              |           |                                      |                      |
| True positive patients                                  | €1,368       | €205      | Gamma (€44;€31)                      | REACH <sup>+</sup>   |
| False positive patients                                 | €961         | €144      | Gamma (€44;€22)                      | REACH <sup>+</sup>   |
| True negative patients                                  | €710         | €107      | Gamma (€44;€16)                      | REACH <sup>+</sup>   |
| False negative patients                                 | €1,691       | €254      | Gamma (€44;€38)                      | REACH <sup>+</sup>   |
| <b>Costs per 3 months – 12-60 months</b>                |              |           |                                      |                      |
| MTX                                                     | €38          | €3        | Gamma (€44;€0.41)                    | [3]                  |
| Biologic DMARD                                          | €3,500       | €525      | Gamma (€44;€79)                      | [3]                  |
| Other sDMARD                                            | €27          | €2        | Gamma (€192;€0.14)                   | tREACH <sup>++</sup> |
| <b>Direct medical costs</b>                             |              |           |                                      |                      |
| DAS28 <sub>≤2.6</sub>                                   | €105         | €3        | Gamma (€964;€0.11)                   | tREACH <sup>++</sup> |
| DAS28 <sub>&gt;2.6–≤3.2</sub>                           | €133         | €8        | Gamma (€287;€0.47)                   | tREACH <sup>++</sup> |
| DAS28 <sub>&gt;3.2</sub>                                | €190         | €6        | Gamma (€959;€0.20)                   | tREACH <sup>++</sup> |
| <b>Productivity costs</b>                               |              |           |                                      |                      |
| DAS28 <sub>≤2.6</sub>                                   | €493         | €74       | Gamma (€44;€11)                      | tREACH <sup>++</sup> |
| DAS28 <sub>&gt;2.6–≤3.2</sub>                           | €908         | €136      | Gamma (€44;€20)                      | tREACH <sup>++</sup> |

| <b>Parameter</b>                                      | <b>Value</b> | <b>SE</b> | <b>Distribution<br/>(alpha;beta)</b> | <b>Source</b>         |
|-------------------------------------------------------|--------------|-----------|--------------------------------------|-----------------------|
| DAS28>3.2                                             | €1,247       | €187      | Gamma (€44;€28)                      | tREACH <sup>++</sup>  |
| <b>Costs non-RA patients</b>                          |              |           |                                      |                       |
| 12-60 months (for 4 years)                            | €5,600       | €840      | Gamma (€44;€126)                     | Estimate <sup>#</sup> |
| <b>Cost new diagnostic tests</b>                      |              |           |                                      |                       |
| MRI of both hands and feet                            | €756         |           |                                      | [4]                   |
| B-cell test                                           | €150         |           |                                      | Estimate <sup>#</sup> |
| IL-6 test                                             | €50          |           |                                      | Estimate <sup>#</sup> |
| Genetic assay test                                    | €750         |           |                                      | Estimate <sup>#</sup> |
| <b>Utilities</b>                                      |              |           |                                      |                       |
| True positive patients – baseline                     | 0.600        | 0.015     | Beta (626;417)                       | REACH <sup>+</sup>    |
| 12 months                                             | 0.700        | 0.010     | Beta (2,354;1,569)                   | Estimate <sup>#</sup> |
| False positive patients – baseline                    | 0.650        |           | Beta (548;295)                       | REACH <sup>+</sup>    |
| 12 months                                             | 0.700        | 0.016     | Beta (1,471;490)                     | Estimate <sup>#</sup> |
| 12 months                                             |              | 0.010     |                                      |                       |
| True negative patients – baseline                     | 0.650        |           | Beta (548;295)<br>Beta (882;156)     | REACH <sup>+</sup>    |
| 12 months                                             | 0.750        | 0.016     |                                      | Estimate <sup>#</sup> |
| 12 months                                             |              | 0.011     |                                      |                       |
| False negative patients – baseline                    | 0.600        |           | Beta (626;417)                       | REACH <sup>+</sup>    |
| 12 months                                             | 0.550        | 0.015     | Beta (2,942;2,942)                   | Estimate <sup>#</sup> |
| 12 months                                             |              | 0.007     |                                      |                       |
| <b>Patients not using a biological – 12-60 months</b> |              |           |                                      |                       |
| EQ-5D always >0.5 over time                           |              |           |                                      |                       |
| DAS28≤2.6                                             | 0.858        | 0.003     | Beta (11,632;1,923)                  | tREACH <sup>++</sup>  |
| DAS28>2.6–≤3.2                                        | 0.815        | 0.006     | Beta (3,387;770)                     | tREACH <sup>++</sup>  |
| DAS28>3.2                                             | 0.763        | 0.005     | Beta (5,220;1,625)                   | tREACH <sup>++</sup>  |

| Parameter                                 | Value | SE    | Distribution<br>(alpha;beta) | Source                |
|-------------------------------------------|-------|-------|------------------------------|-----------------------|
| EQ-5D at least 1 time period              |       |       |                              |                       |
| <0.5                                      |       |       |                              |                       |
| DAS28 $\leq$ 2.6                          | 0.746 | 0.015 | Beta* (634;216)              | tREACH <sup>++</sup>  |
| DAS28 $>$ 2.6– $\leq$ 3.2                 | 0.674 | 0.027 | Beta* (201;97)               | tREACH <sup>++</sup>  |
| DAS28 $>$ 3.2                             | 0.462 | 0.025 | Beta* (188;219)              | tREACH <sup>++</sup>  |
| <b>Biological patients – 12-60 months</b> |       |       |                              |                       |
| EQ-5D always $>$ 0.5 over time            |       |       |                              |                       |
| DAS28 $\leq$ 2.6                          | 0.825 | 0.008 | Beta (1,990;421)             | tREACH <sup>++</sup>  |
| DAS28 $>$ 2.6– $\leq$ 3.2                 | 0.770 | 0.009 | Beta (1,548;461)             | tREACH <sup>++</sup>  |
| DAS28 $>$ 3.2                             | 0.751 | 0.006 | Beta (3,692;1,226)           | tREACH <sup>++</sup>  |
| EQ-5D at least 1 time period              |       |       |                              |                       |
| <0.5                                      |       |       |                              |                       |
| DAS28 $\leq$ 2.6                          | 0.694 | 0.034 | Beta** (124;55)              | tREACH <sup>++</sup>  |
| DAS28 $>$ 2.6– $\leq$ 3.2                 | 0.623 | 0.049 | Beta** (61;37)               | tREACH <sup>++</sup>  |
| DAS28 $>$ 3.2                             | 0.558 | 0.026 | Beta** (199;157)             | tREACH <sup>++</sup>  |
| <b>Non-RA patients</b>                    |       |       |                              |                       |
| 12-60 months                              | 0.750 | 0.010 | Beta (1471;490)              | Estimate <sup>#</sup> |
| <b>Diagnostic performance of tests</b>    |       |       |                              |                       |
| B-cell test                               |       |       |                              |                       |
| Sensitivity                               | 0.60  |       |                              | [5]                   |
| Specificity                               | 0.90  |       |                              | [5]                   |
| IL-6 serum level test                     |       |       |                              |                       |
| Sensitivity                               | 0.70  |       |                              | [6]                   |
| Specificity                               | 0.53  |       |                              | [6]                   |
| MRI of both hands and feet                |       |       |                              |                       |

| <b>Parameter</b>      | <b>Value</b> | <b>SE</b> | <b>Distribution<br/>(alpha;beta)</b> | <b>Source</b> |
|-----------------------|--------------|-----------|--------------------------------------|---------------|
| Sensitivity           | 0.90         |           |                                      | [7-9]         |
| Specificity           | 0.60         |           |                                      | [7-9]         |
| Genetic assay test    |              |           |                                      |               |
| Sensitivity           | 0.40         |           |                                      | [10]          |
| Specificity           | 0.85         |           |                                      | [10]          |
| <b>Discount rates</b> |              |           |                                      |               |
| Costs                 | 4.0%         |           |                                      | [11]          |
| Health effects        | 1.5%         |           |                                      | [11]          |

Notes: SE: standard error; DHA: Dutch Healthcare Authority; +REACH data on file, details about data collection can be found in Alves et al.[12]; ++tREACH data on file, details about data collection can be found in De Jong et al.[13]; \*Beta distribution adjusted to allow values from -0.2 based on observed tREACH data; \*\*Beta distribution adjusted to allow values from -0.1 based on observed tREACH data; #Estimate based on expert opinion, for the SE data from REACH was used; \*\*\*Costs include diagnostic test costs (frequency laboratory tests and radiographics based on expert opinion; costs derived from the DHA tariffs), medical consultation time based on the Dutch manual for costing in economical evaluations[11]; †continuation of MTX at 12 month is the % of MTX users at 6 months that still use MTX at 12 months; \*\*\*\*True negative patients could use other sDMARDS due to other classifiable disease

## References

- [1] Aletaha D, Neogi T, Silman AJ, et al. Rheumatoid arthritis classification criteria: an American College of Rheumatology/European League Against Rheumatism collaborative initiative. *Ann Rheum Dis* 2010;69(9):1580–8.
- [2] Vermeer M, Kievit W, Kuper HH, et al. Treating to the target of remission in early rheumatoid arthritis is cost-effective: results of the DREAM registry. *BMC Musculoskelet Disord* 2013;14:350.
- [3] National Health Care Institute. <http://www.medicijnkosten.nl/default.asp>. Accessed 2 February 2015.
- [4] Dutch Healthcare Authority (in Dutch: Nederlandse Zorgautoriteit, NZa). NZa Zorgproducten Tariefapplicatie. Available at: <http://dbc-zorgproducten-tarieven.nza.nl/nzaZpTarief/ZoekfunctieDbc.aspx>. Accessed May 1, 2013.
- [5] Van Baarsen LG, Bos WH, Rustenburg F, et al. Gene expression profiling in autoantibody-positive patients with arthralgia predicts development of arthritis. *Arthritis Rheum* 2010;62(3):694-704.
- [6] Gottenberg JE, Dayer JM, Lukas C, et al. Serum IL-6 and IL-21 are associated with markers of B cell activation and structural progression in early rheumatoid arthritis: results from the ESPOIR cohort. *Ann Rheum Dis*. 2012;71(7):1243-8.
- [7] Duer-Jensen A, Hørslev-Petersen K, Hetland ML, et al. Bone edema on magnetic resonance imaging is an independent predictor of rheumatoid arthritis development in patients with early undifferentiated arthritis. *Arthritis Rheum*. 2011;63(8):2192-202.
- [8] Bird P, Conaghan P, Ejbjerg B, et al. The development of the EULAR-OMERACT rheumatoid arthritis MRI reference image atlas. *Ann Rheum Dis* 2005;64(1):i8-10.
- [9] Nieuwenhuis WP, Krabben A, Stomp W, et al. Evaluation of magnetic resonance imaging-detected tenosynovitis in the hand and wrist in early arthritis. *Arthritis Rheumatol* 2015;67(4):869-76.
- [10] Yarwood A, Huizinga TW, Worthington J. The genetics of rheumatoid arthritis: risk and protection in different stages of the evolution of RA. *Rheumatology* 2014 (in press).
- [11] College voor zorgverzekeringen (CVZ). Guidelines for pharmacoeconomic research, updated version. Diemen: College voor zorgverzekeringen 2006.
- [12] Alves C, Luime JJ, Van Zeben D, et al. Diagnostic performance of the ACR/EULAR 2010 criteria for rheumatoid arthritis and two diagnostic algorithms in an early arthritis clinic (REACH). *Ann Rheum Dis* 2011;70(9):1645–7.
- [13] De Jong PH, Hazes JM, Han HK, et al. Randomised comparison of initial triple DMARD therapy with methotrexate monotherapy in combination with low-dose glucocorticoid bridging therapy; 1-year data of the tREACH trial. *Ann Rheum Dis* 2014;73(7):1331–9.
